# Supplementary material
Source: publisher figshare collection journal article supplement (https://acs.figshare.com/ndownloader/files/5712048)
Supplement: Supplementary file 1 [file 5712048]

## A. Syntheses:

### I. 4,7-Diphenyl-1,10-phenanthroline-1,2-dithiolato-*ortho*-carborane platinum(II),

[Pt(dpphen)(dtoc)].

1,2-dithiolato-*closo*-1,2-dicarbadoecaborane(12) was synthesized according to published procedure (see Smith, H.D., Obenland, C.O., Papetti, S. *Inorg. Chem.* **1966**, 5, 1013 & Nakamura, H., Aoyagi, K., Yamamoto, Y. *Inorg. Chem.* **1997**, 62, 780). **1** was synthesized by reacting 1,2-dithiol-*ortho*-carborane with 2 equivalents of Proton Sponge and Pt(dpphen)Cl<sub>2</sub> in dry CH<sub>2</sub>Cl<sub>2</sub> for 3.5 hours (Yield 82%). Mass Spect. of **1** exhibits a typical pattern for polyhedral borane compounds with a multiplet at 733.8 m/z corresponding to the molecular weight of the product. <sup>1</sup>H NMR (CDCl<sub>3</sub>) δ 8.43 (d, 2H), 7.53 (s, 2H), 7.24 (d, 2H), 7.06-7.08 (m, 10H), 1.2-3.3 (m, 10H, BH). Anal. Calc. C, 45.07; H, 3.78; N, 3.62. Found C, 44.94; H, 3.93; N, 3.84.

### II. 4,7-Diphenyl-1,10-phenanthroline-3,5-di-*tert*-butylbenzene-1,2-dithiolate, platinum(II),

[Pt(dpphen)(dtbdt)].

4,7-Diphenyl-1,10-phenanthrolineplatinum(II) dichloride (0.9036 g; 1.510 mmol) was suspended in 250 mL of dichloromethane. A solution of excess 3,5-di-*t*-butylbenzenedithiol, and Proton Sponge (0.360 g) was added to the suspension, which immediately turned from yellow to green. The mixture was heated to reflux for 5 hours during which time the solution became dark blue. Removal of the solvent by rotary evaporation yielded a dark blue residue which was dissolved in dichloromethane. Purification by column chromatography on silica gel (1:1 benzene/dichloromethane) yielded a purple solid of analytical purity (yield 25%). <sup>1</sup>H NMR (CDCl<sub>3</sub>) δ 9.5 (d, 1H), 9.4 (d, 1H), 7.9 (s, 2H), 7.6 (m, 2H), 7.5 (m, 8H), 7.4 (m, 2H), 7.3 (s, 1H), 7.2 (s, 1H), 1.7 (s, 9H), 1.3 (s, 9H). FAB-MS m/z 779.2 (M<sup>+</sup>). Anal. Calcd for C<sub>38</sub>H<sub>36</sub>N<sub>2</sub>S<sub>2</sub>Pt: C, 58.52; H, 4.65; N, 3.59. Found C, 58.65; H, 4.70; N, 3.51.

### III. 4,7-Diphenyl-1,10-phenanthroline-3,5-di-*tert*-butyl-1,2-catecholate platinum(II),

[Pt(dpphen)(dtbc)].

Pt(dpphen)(dtbc) was synthesized by reacting di-*tert*-butyl catechol with KOH (2 eq. in MeOH) and Pt(dpphen)Cl<sub>2</sub> in refluxing CH<sub>2</sub>Cl<sub>2</sub> for 24 hours (yield 74%). <sup>1</sup>H NMR (CD<sub>2</sub>Cl<sub>2</sub>) δ 9.59 (m, 2H), 8.02 (s, 2H), 7.79 (m, 2H), 7.64-7.59 (m, 11H), 7.57 (s, 1H), 1.57 (s, 9H), 1.35 (s, 9H). Anal. Calc. C, 61.03; H, 4.85; N, 3.75. Found 60.78; H, 4.91; N, 3.68.

**B. Optical Properties of the Metal Chromophores**

| Metal Chromophore | $\lambda_{\max}$ nm ( $M^{-1} \text{ cm}^{-1}$ ) in 2-Me-THF | Emission max in 2-Me-THF (RT) |
|-------------------|--------------------------------------------------------------|-------------------------------|
| <b>I</b>          | 460 ( $1.1 \times 10^4$ )                                    | 594                           |
| <b>II</b>         | 634 ( $8.3 \times 10^3$ )                                    | 810                           |
| <b>III</b>        | 657 ( $1.1 \times 10^4$ )                                    | no emission observed          |

**Solvatochromic Property of I**

| solvent                            | $E^N_T$ | $\lambda_{\max}$ nm | $M^{-1} \text{ cm}^{-1}$ |
|------------------------------------|---------|---------------------|--------------------------|
| C <sub>6</sub> H <sub>6</sub>      | 0.111   | 482                 | $5.14 \times 10^3$       |
| 2-CH <sub>3</sub> -THF             | 0.179   | 457                 | $9.05 \times 10^3$       |
| CHCl <sub>3</sub>                  | 0.259   | 460                 | $9.23 \times 10^4$       |
| CH <sub>2</sub> Cl <sub>2</sub>    | 0.309   | 454                 | $10.4 \times 10^4$       |
| (CH <sub>3</sub> ) <sub>2</sub> CO | 0.355   | 446                 | $11.6 \times 10^4$       |
| CH <sub>3</sub> CN                 | 0.460   | 437                 | $7.31 \times 10^3$       |
| CH <sub>3</sub> NO <sub>2</sub>    | 0.481   | 437                 | $9.31 \times 10^3$       |
| C <sub>2</sub> H <sub>5</sub> OH   | 0.654   | 420                 | $11.1 \times 10^3$       |

**Solvatochromic Property of II**

| solvent                            | $E^N_T$ | $\lambda_{\max}$ nm | $M^{-1} \text{ cm}^{-1}$ |
|------------------------------------|---------|---------------------|--------------------------|
| C <sub>6</sub> H <sub>6</sub>      | 0.111   | 684                 | $8.32 \times 10^3$       |
| 2-CH <sub>3</sub> -THF             | 0.179   | 660                 | $10.8 \times 10^3$       |
| CHCl <sub>3</sub>                  | 0.259   | 634                 | $8.34 \times 10^4$       |
| CH <sub>2</sub> Cl <sub>2</sub>    | 0.309   | 612                 | $8.14 \times 10^4$       |
| (CH <sub>3</sub> ) <sub>2</sub> CO | 0.355   | 613                 | $9.24 \times 10^4$       |
| DMSO                               | 0.444   | 590                 | $9.63 \times 10^4$       |
| CH <sub>3</sub> CN                 | 0.460   | 581                 | $8.55 \times 10^3$       |
| CH <sub>3</sub> NO <sub>2</sub>    | 0.481   | 583                 | $9.12 \times 10^3$       |

**Solvatochromic Property of III**

| solvent                            | $E^N_T$ | $\lambda_{\max}$ nm | $M^{-1} \text{ cm}^{-1}$ |
|------------------------------------|---------|---------------------|--------------------------|
| C <sub>7</sub> H <sub>8</sub>      | 0.099   | 719                 | $9.45 \times 10^3$       |
| 2-CH <sub>3</sub> -THF             | 0.179   | 680                 | $7.62 \times 10^3$       |
| CHCl <sub>3</sub>                  | 0.259   | 657                 | $1.52 \times 10^4$       |
| CH <sub>2</sub> Cl <sub>2</sub>    | 0.309   | 621                 | $6.71 \times 10^4$       |
| (CH <sub>3</sub> ) <sub>2</sub> CO | 0.355   | 625                 | $1.15 \times 10^4$       |
| CH <sub>3</sub> CN                 | 0.460   | 589                 | $4.71 \times 10^3$       |
| CH <sub>3</sub> NO <sub>2</sub>    | 0.481   | 583                 | $8.06 \times 10^3$       |
| CH <sub>3</sub> OH                 | 0.762   | 558                 | $6.37 \times 10^3$       |

### C. EFISH Measurements

The conventional EFISH (Electric field Induced Second Harmonic) technique was used to measure the quadratic hyperpolarizability of the compounds [J.L. Oudar, J. Chem. Phys. 67 (1977) 446; and reference 31]. The initial wavelength 1.064 mm of a Nd:Yag laser was shifted to 1.907 mm by stimulated Raman scattering in a high pressure hydrogen cell. DC electric field pulses with amplitude up to 30 kV/cm were applied to the solutions placed in a wedge cell. The second harmonic signals were calibrated to a quartz wedge (quadratic hyperpolarizability taken equal to  $1.1 \cdot 10^{-19}$  esu at 1.907 mm). Experimental details and analytical expressions for the mean microscopic hyperpolarizability  $\gamma$  are given in Oudar 1977. Neglecting the purely electronic contribution (appropriate for medium sized conjugated molecules) leads to the expression

$$\gamma = \frac{\mu\beta(2\omega)}{5kT}$$

where  $kT$  is the Boltzmann factor,  $\mu_g$  the dipole moment of the molecular ground state,  $\beta$  stands for the vector part of tensor  $\beta_{ijk}(2\omega)$ . In the two level approximation the dispersion dependence of the quadratic hyperpolarizability  $\beta(\omega)$  is described by the simple dispersion factor

$$\beta(\omega) = \frac{\omega_{\max}^4}{(\omega_{\max}^2 - \omega^2)(\omega_{\max}^2 - 4\omega^2)} \beta(0)$$

where the  $\omega$ 's are the pulsations corresponding respectively to the fundamental laser wavelength  $\lambda$  and  $\lambda_{\max}$ , and  $\beta(0)$  the intrinsic static hyperpolarizability.
